# Supplementary material for: Large-scale deletions of the ABCA1 gene in patients with hypoalphalipoproteinemia
Source: PubMed Central journal article supplement (PMC6071767; doi:10.1194/jlr.p086280), 2018-06-04
Supplement: 10.1194_P086280_jlr.P086280-1.pdf [file 10.1194_P086280_jlr.P086280-1.pdf]

**Supplemental Table S1:** Screening primers for *ABCA1* copy-number variations.

| CNV                                                                                                                                                                                                                                                                                                                                                                                            | Breakpoint | Primer direction | Primer sequence (5' to 3')   | Annealing temperature (°C) | Primer labels in Figure 1 and 2 |
|------------------------------------------------------------------------------------------------------------------------------------------------------------------------------------------------------------------------------------------------------------------------------------------------------------------------------------------------------------------------------------------------|------------|------------------|------------------------------|----------------------------|---------------------------------|
| Exon 4                                                                                                                                                                                                                                                                                                                                                                                         | Upstream   | FWD              | CCAAATAGCTGAGACTACAGGCATG    | 60                         | P1                              |
|                                                                                                                                                                                                                                                                                                                                                                                                |            | REV              | GTGATGGTGAAGGTATTTTCAG       | 60                         | P2                              |
|                                                                                                                                                                                                                                                                                                                                                                                                | Downstream | FWD              | CATGACTGCATTGGTATAAAGATG     | 60                         | P3                              |
|                                                                                                                                                                                                                                                                                                                                                                                                |            | REV              | ATCACTGTCTGTGGCAACCAG        | 60                         | P4                              |
| Exons 8 to 31                                                                                                                                                                                                                                                                                                                                                                                  | Upstream   | FWD              | GACCCAGCTTCCAATCTTCATAATCCTC | 60                         | P5                              |
|                                                                                                                                                                                                                                                                                                                                                                                                |            | REV              | GGTTGCAAAGATCCCTGTAGAG       | 60                         | P6                              |
|                                                                                                                                                                                                                                                                                                                                                                                                | Downstream | FWD              | GAGATATCATGTTGGGAGGGTCTG     | 60                         | P7                              |
|                                                                                                                                                                                                                                                                                                                                                                                                |            | REV              | GCCACAGTCTGTCCTGTGACTTTAC    | 60                         | P8                              |
| Full deletion                                                                                                                                                                                                                                                                                                                                                                                  | Upstream   | FWD              | TATCATGCTACTCAGAACAGCATG     | 60                         | P9                              |
|                                                                                                                                                                                                                                                                                                                                                                                                |            | REV              | TGGTGATTCTTGTGTGCACAAAG      | 60                         | P10                             |
|                                                                                                                                                                                                                                                                                                                                                                                                | Downstream | FWD              | CAGGATATTACATAGGTAAGCAGG     | 60                         | P11                             |
|                                                                                                                                                                                                                                                                                                                                                                                                |            | REV              | CTTAATGATAGTGGAAGACAAGGAG    | 60                         | P12                             |
| <p>The primers listed were designed to flank the two breakpoints for each CNV. The “Breakpoint” listed is relative to the deletion section of the gene. The sequence orientation for P1-P8 are relative to the <i>ABCA1</i> gene, while the sequence orientation for P9-P12 are relative to the full chromosome. Abbreviations: CNV = copy-number variation; FWD = forward; REV = reverse.</p> |            |                  |                              |                            |                                 |

A

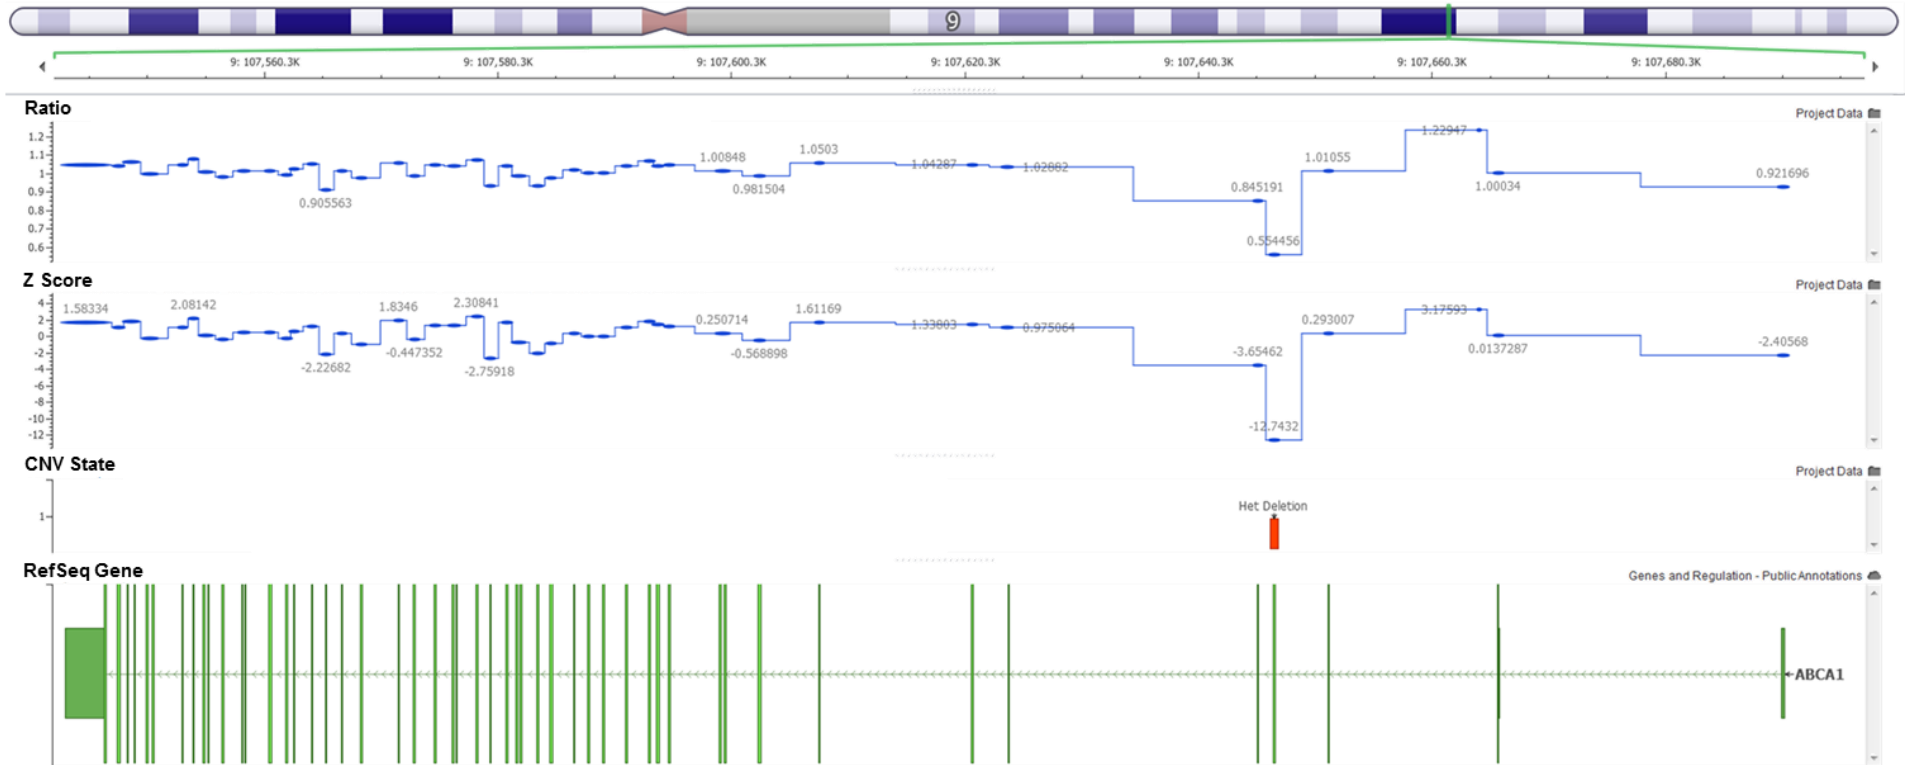

**B**

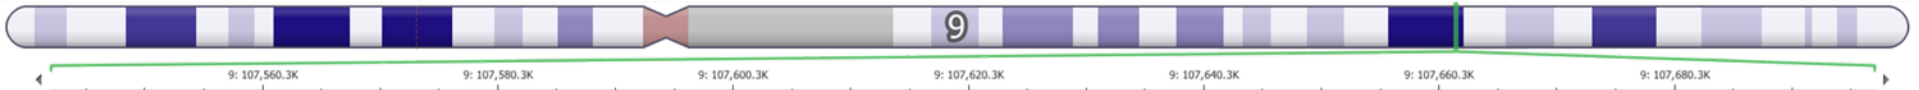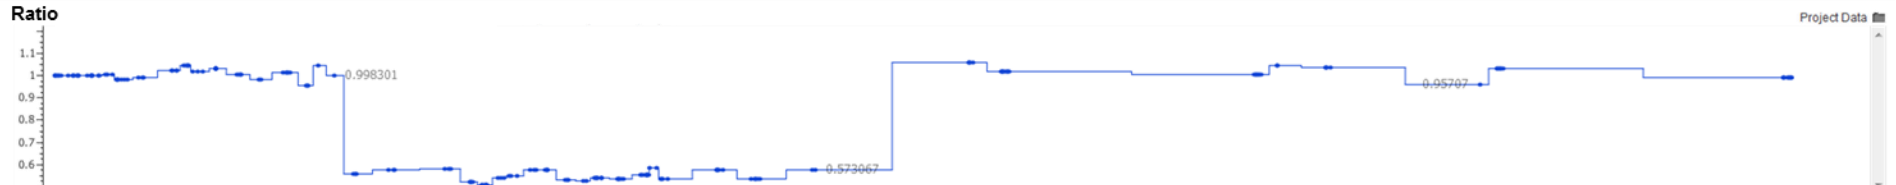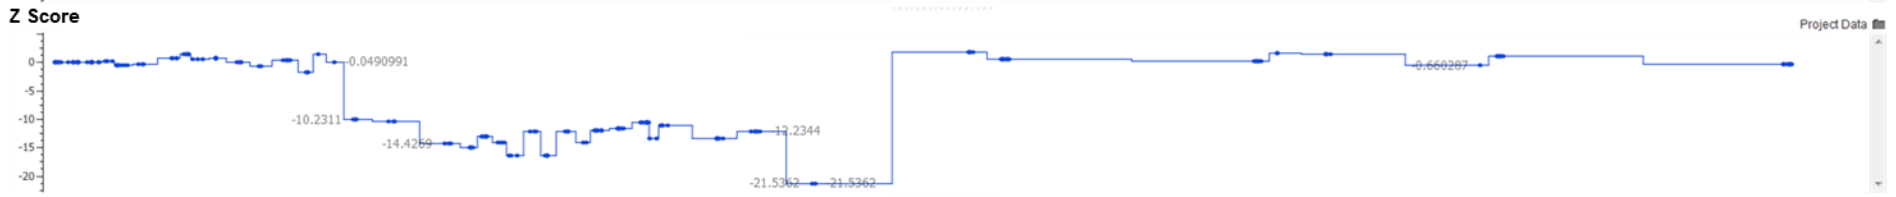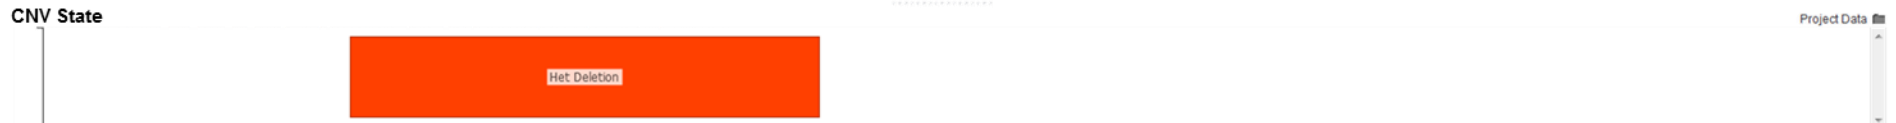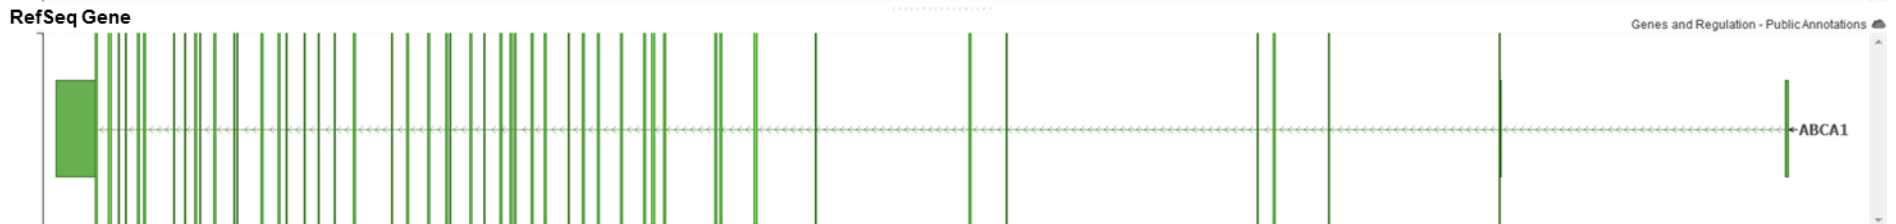

C

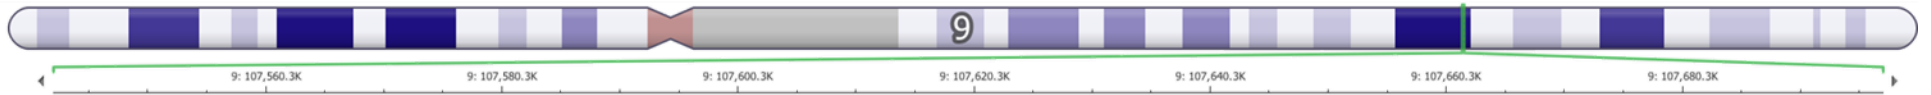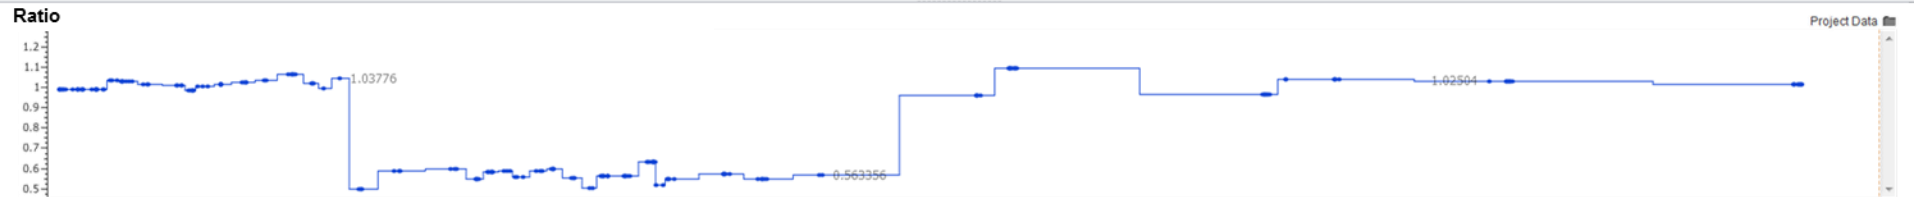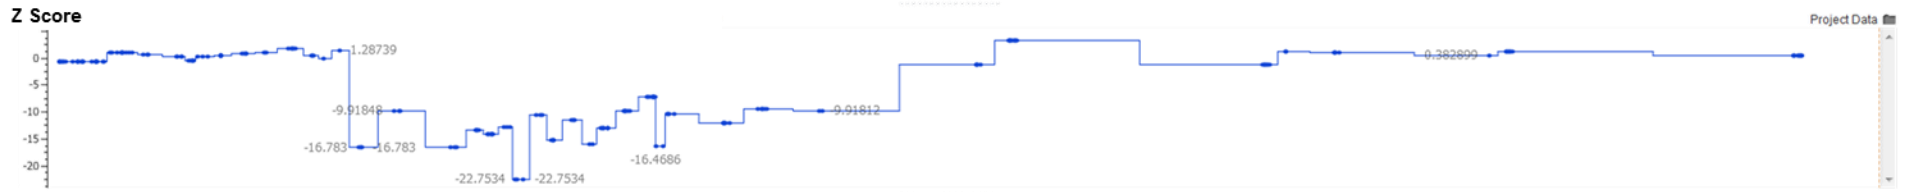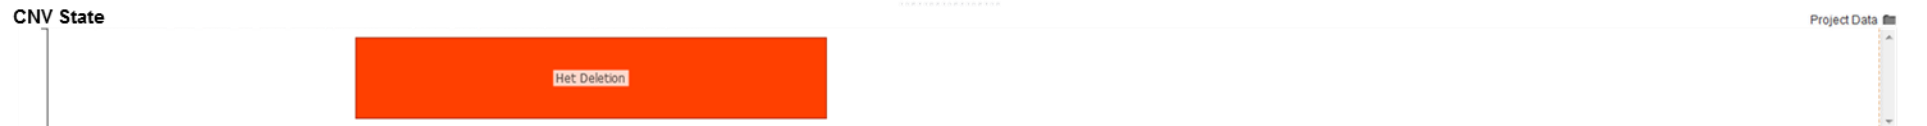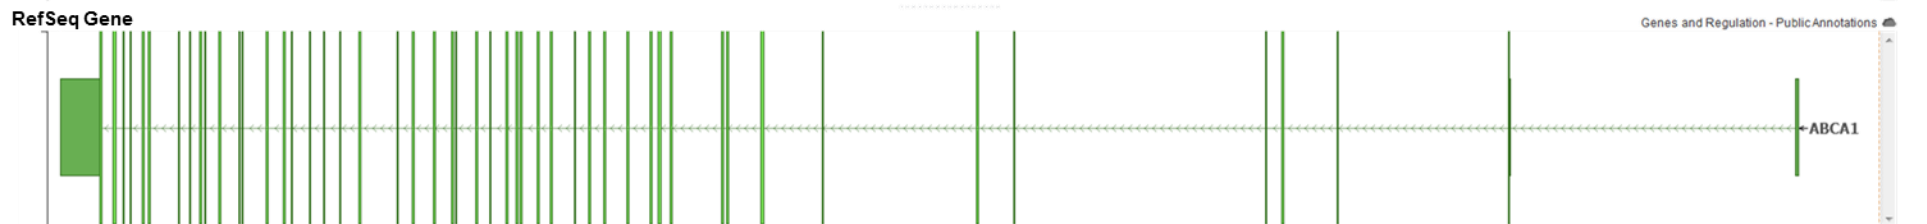

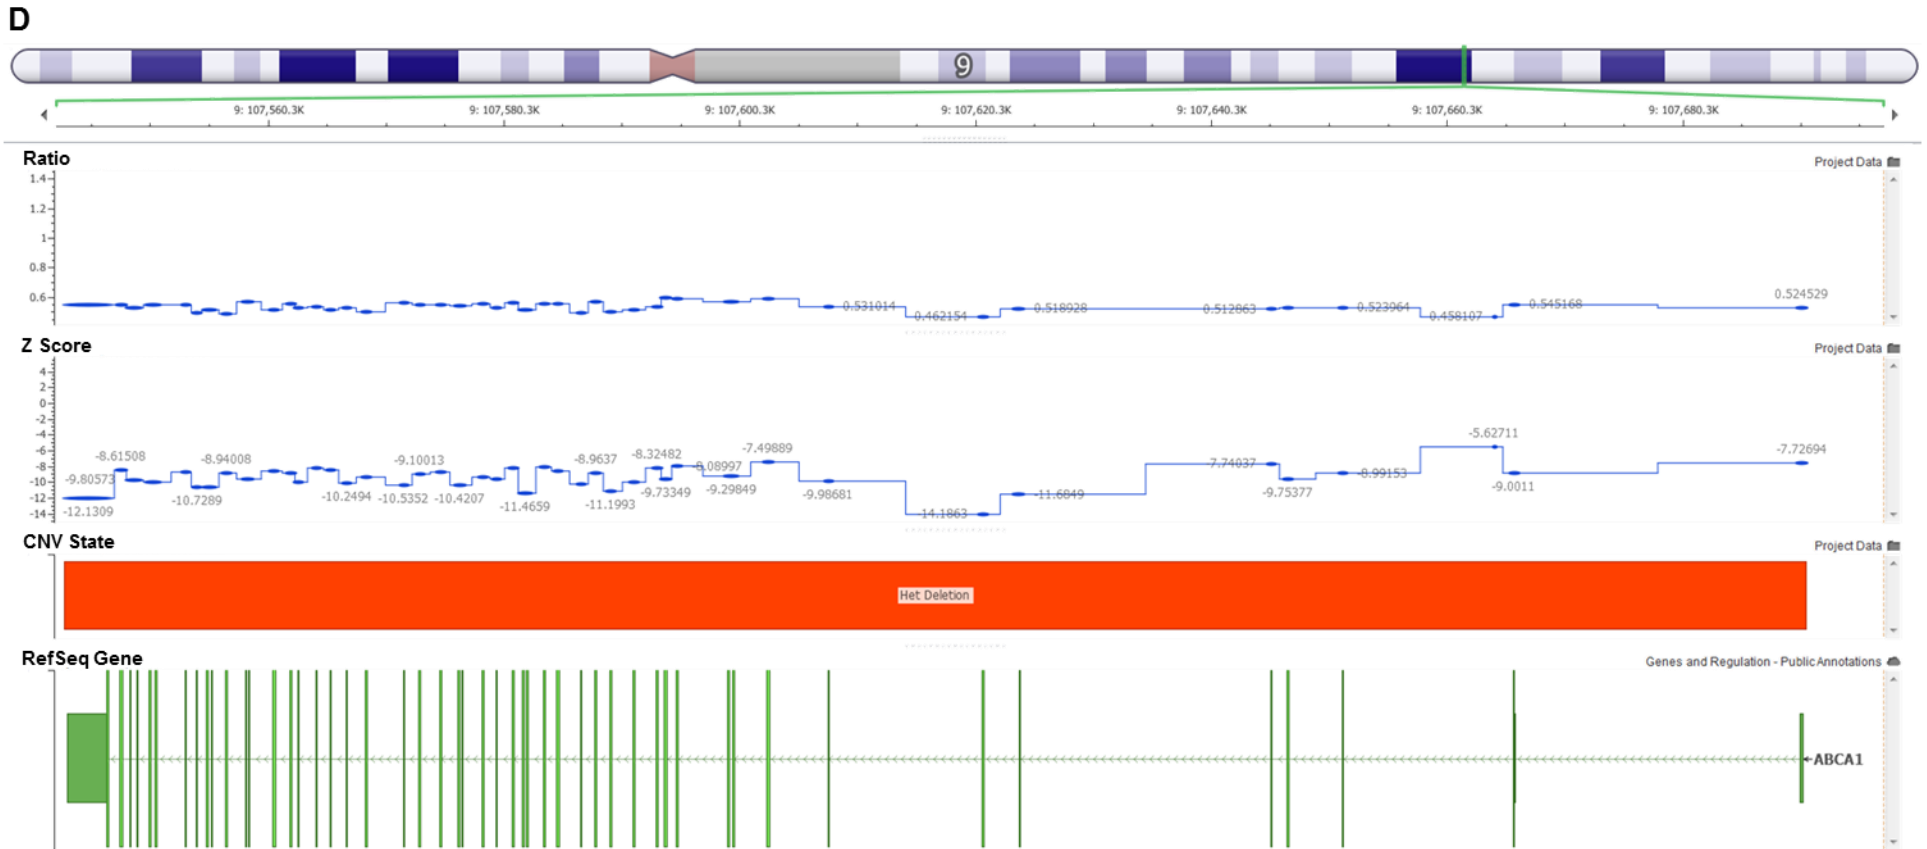

**Supplemental Figure S1. Identification of *ABCA1* CNVs using the VarSeq-CNV® caller algorithm on targeted sequencing data.** Chr9:107,542,273–107,697,356 (hg19 genome build) is the region visualized in each panel, with the CNV “ratio”, “Z score”, and “state” available for each subject. **A)** Subject 1, carrier of a heterozygous deletion of exon 4. **B)** Subject 2, carrier of a heterozygous deletion spanning exons 8 to 31. **C)** Subject 3, carrier of a heterozygous deletion spanning exons 8 to 31. **D)** Subject 4, carrier of a heterozygous deletion of the entire *ABCA1* gene. CNV = copy-number variation.

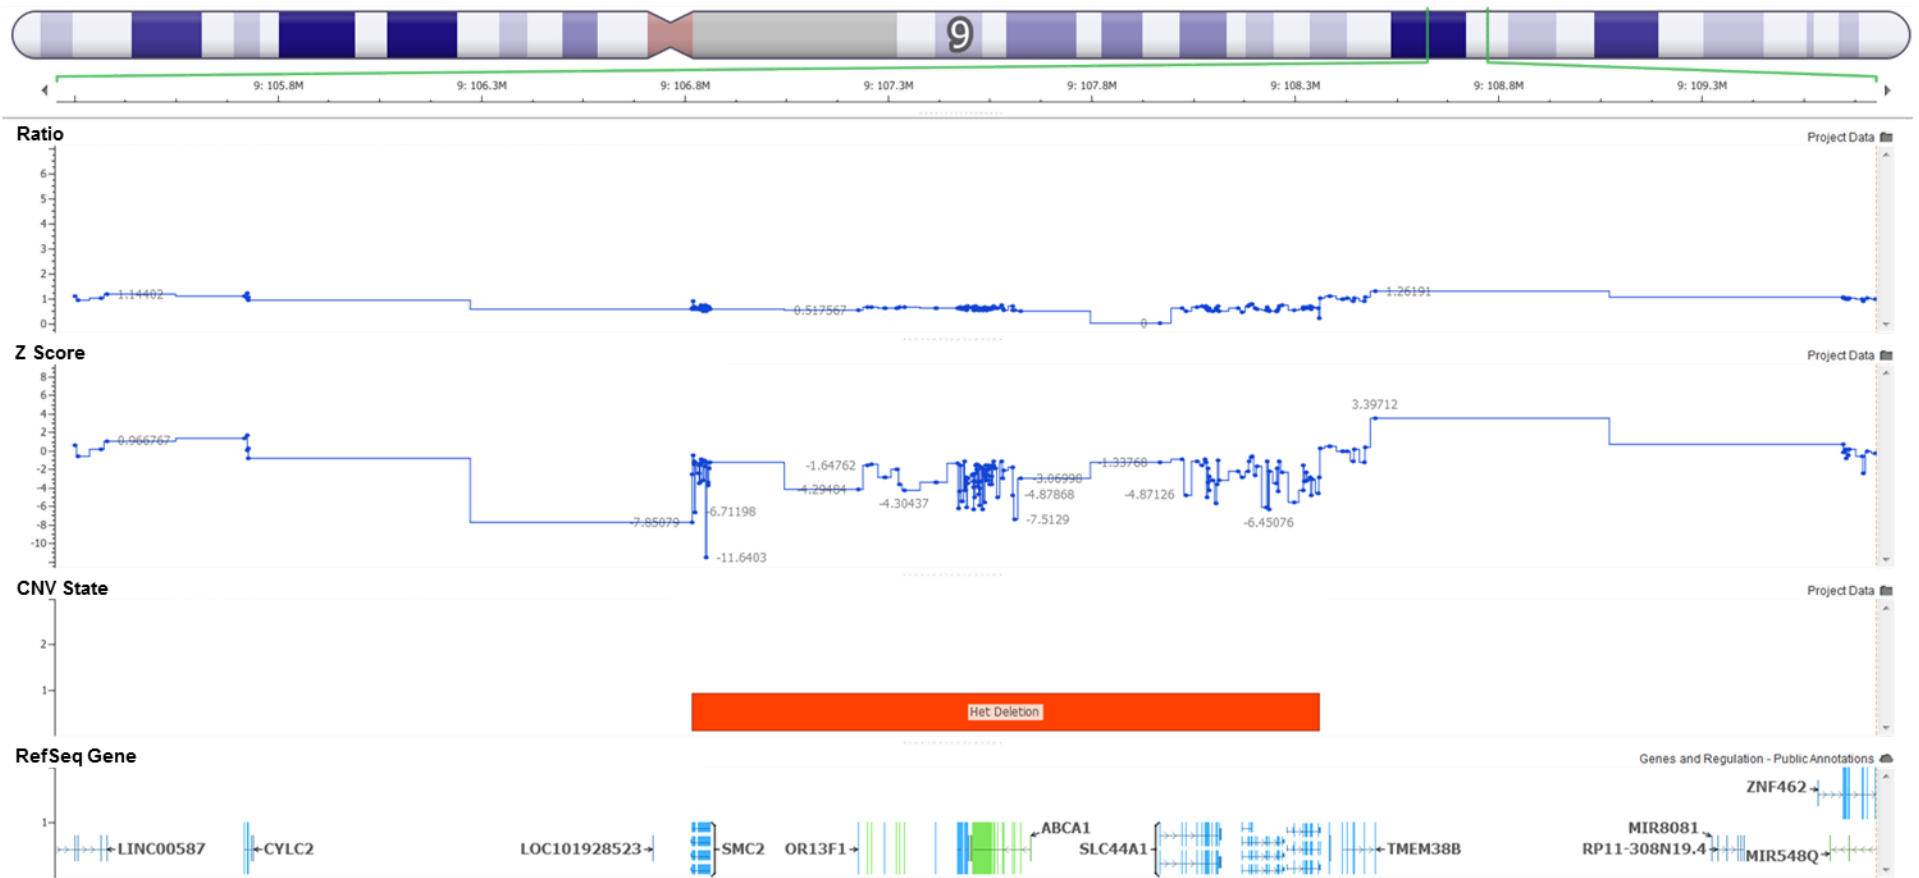

**Supplemental Figure S2. Confirmation of the full-gene *ABCA1* CNV using the VarSeq-CNV® caller algorithm on exome data.** Chr9:105,295,869–109,769,141 (hg19 genome build) is the region visualized, with the CNV “ratio”, “Z score”, and “state” available for the subject. Subject 4, carrier of a heterozygous deletion of the entire *ABCA1* gene and surrounding loci. CNV = copy-number variation.
